# Supplementary material for: Diblock copolymers composed of a liquid crystalline azo block and a poly(dimethylsiloxane) block: synthesis, morphology and photoresponsive properties
Source: Royal Society of Chemistry journal article supplement (doi:10.1039/c4ra09863c), 2014-10-28
Supplement: c4ra09863c1.pdf [file c4ra09863c1.pdf]

# Diblock Copolymers Composed of Liquid Crystalline Azo block and Poly(dimethylsiloxane) Block: Synthesis, Morphology and Photoresponsive Properties

*Renbo Wei, Yaning He and Xiaogong Wang\**

Department of Chemical Engineering, Laboratory of Advanced  
Materials (MOE), Tsinghua University, Beijing, P. R. China 100084

## Supporting information

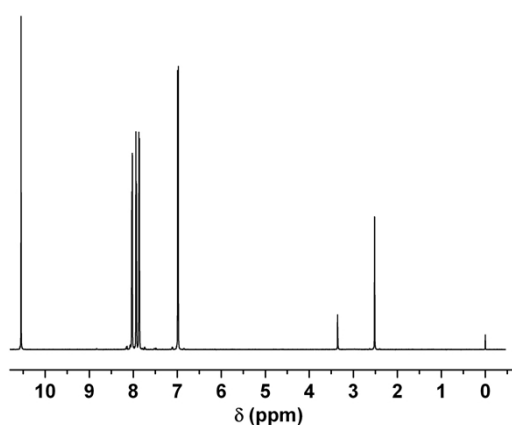

**Fig. S1** <sup>1</sup>H NMR spectrum of 4-cyano-4'-hydroxyazobenzene.

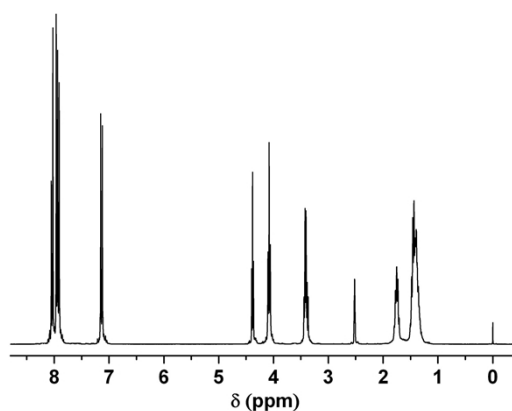

**Fig. S2** <sup>1</sup>H NMR spectrum of 4-cyano-4'-(6-hydroxyhexyloxy)azobenzene.

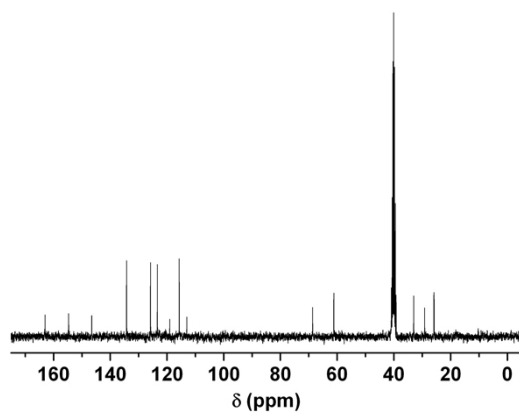

**Fig. S3**  $^{13}\text{C}$  NMR spectrum of 4-cyano-4'-(6-hydroxyhexyloxy)azobenzene.

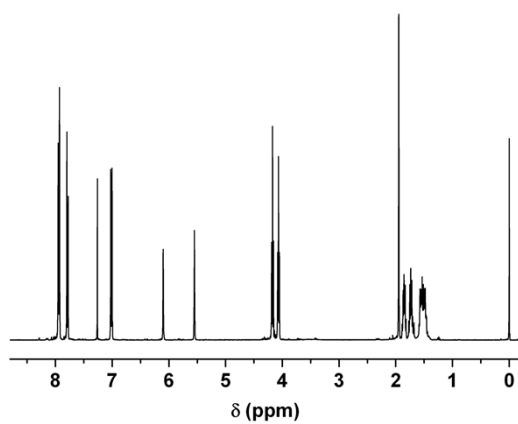

**Fig. S4**  $^1\text{H}$  NMR spectrum of 6-(4-(4'-cyanophenylazo)phenoxy)-hexyl acrylate (OCN).

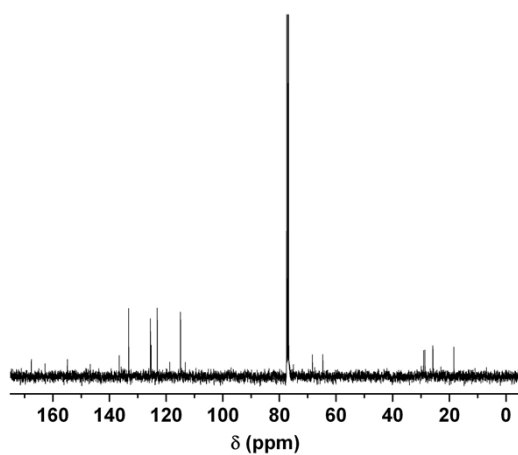

**Fig. S5**  $^{13}\text{C}$  NMR spectrum of 6-(4-(4'-cyanophenylazo)phenoxy)-hexyl acrylate (OCN).

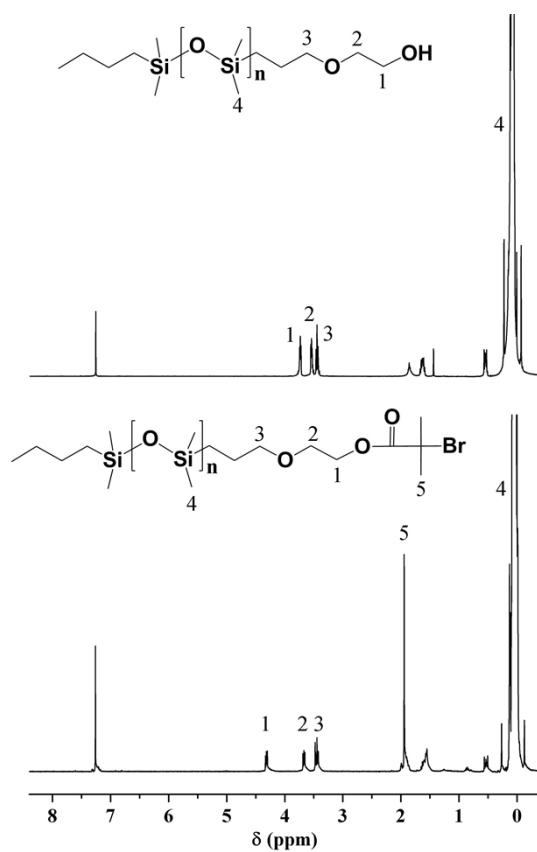

**Fig. S6**  $^1\text{H}$  NMR spectra of PDMS-OH and PDMS-Br.

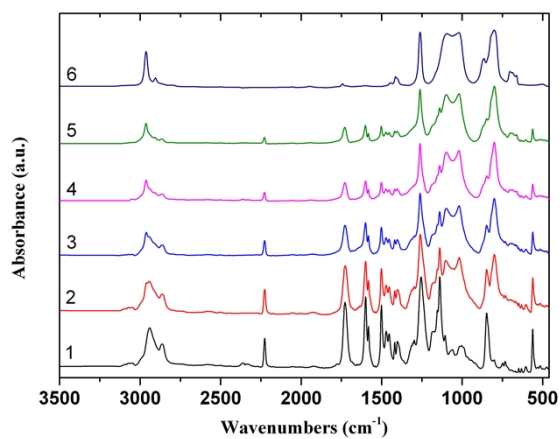

**Fig. S7** FT-IR spectra of the polymers: (1) POCN, (2) PDMS<sub>58</sub>-*b*-POCN<sub>36</sub>, (3) PDMS<sub>58</sub>-*b*-POCN<sub>24</sub>, (4) PDMS<sub>58</sub>-*b*-POCN<sub>15</sub>, (5) PDMS<sub>58</sub>-*b*-POCN<sub>8</sub>, (6) PDMS-Br.

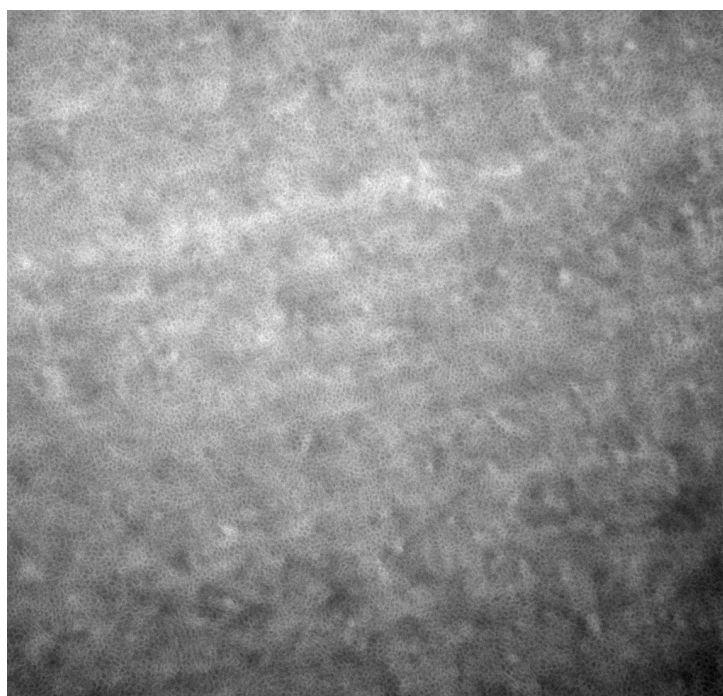

15-1.tif  
15:52 12-17-13

500 nm

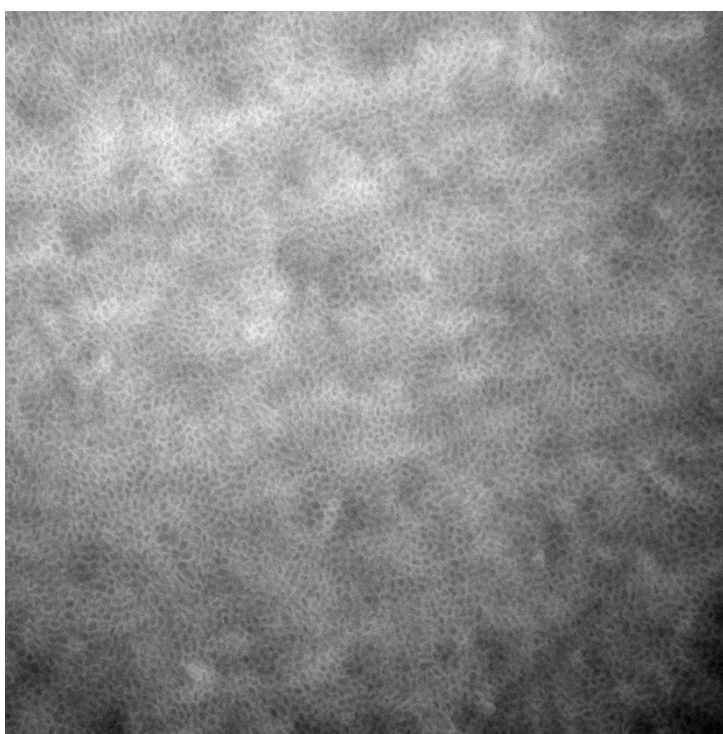

15-4.tif  
15:53 12-17-13

100 nm

**Fig. S8** Typical TEM images of PDMS<sub>58</sub>-*b*-POCN<sub>24</sub>.

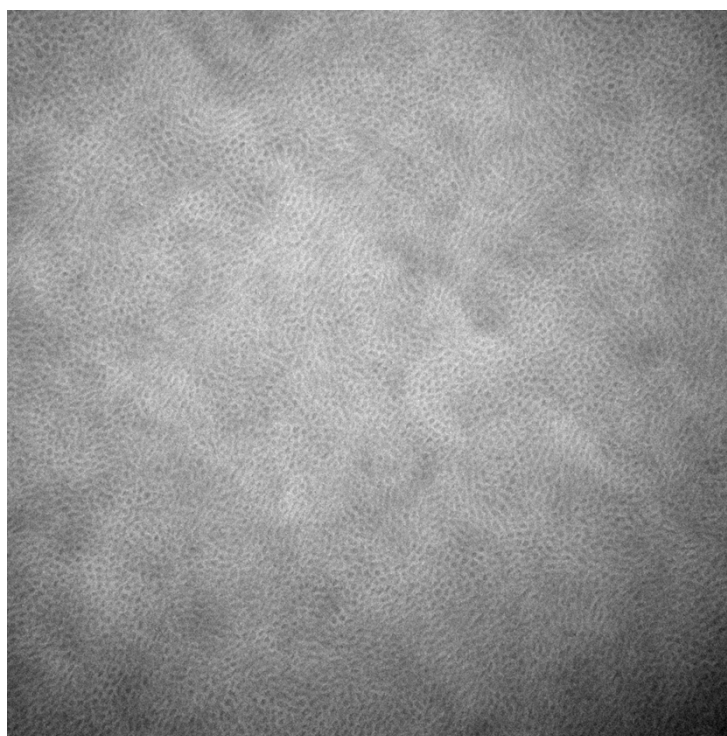

3-1.tif  
13:33 12-06-13

100 nm

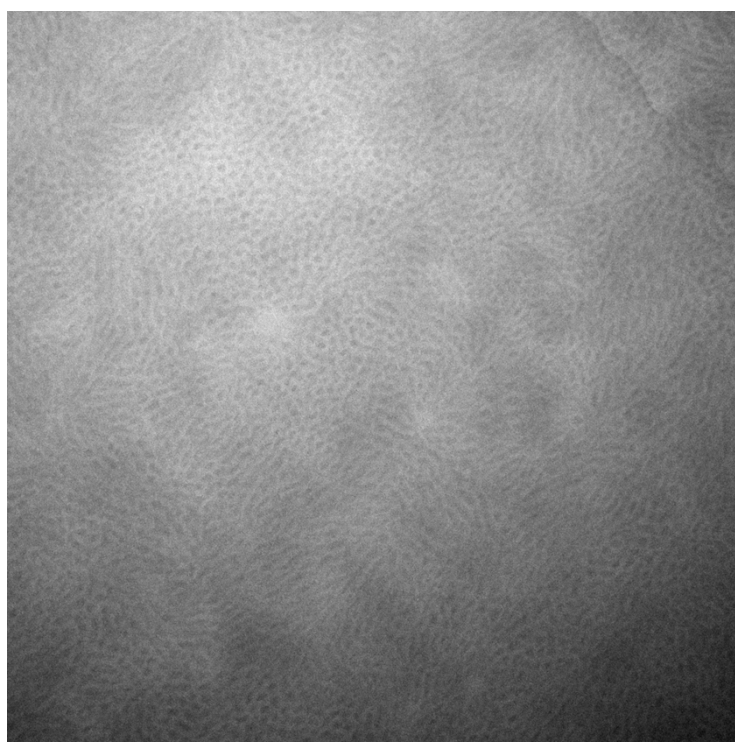

3-6.tif  
13:39 12-06-13

100 nm

**Fig. S9** Typical TEM images of PDMS<sub>58</sub>-*b*-POCN<sub>36</sub>.

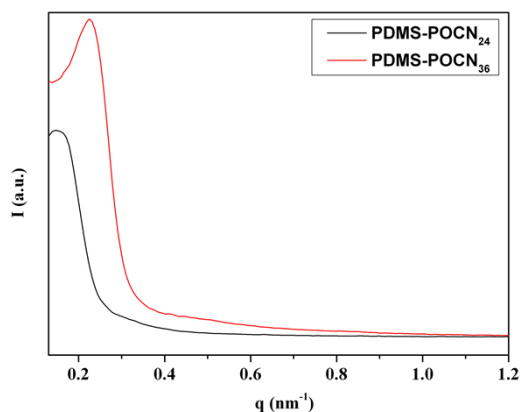

**Fig. S10** Small-angle X-ray scattering (SAXS) profiles of two diblock copolymers at room temperature. The 1D SAXS experiment was performed with a high-flux SAXS instrument (SAXSess, Anton Paar) equipped with Kratky block-collimation system and a Philips PW3830 sealed-tube X-ray generator (Cu  $K_{\alpha}$ ).

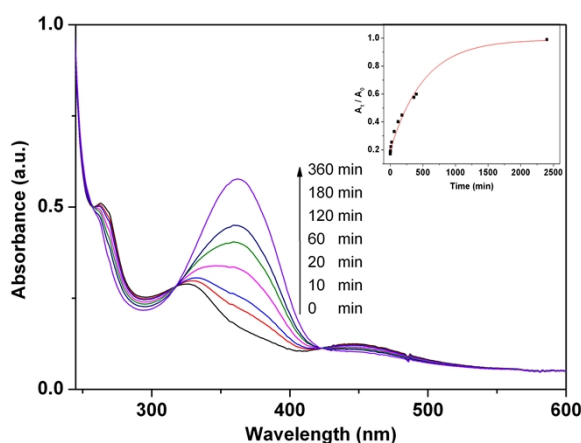

**Fig. S11** The thermal *cis-trans* isomerization kinetics of the solution of PDMS-*b*-POCN<sub>8</sub> in dark at room temperature after the irradiated with UV light (365 nm) for 5 min. The inset is the relative absorbance ( $\lambda_{357}$ ) in different time intervals and the corresponding fitted curve.

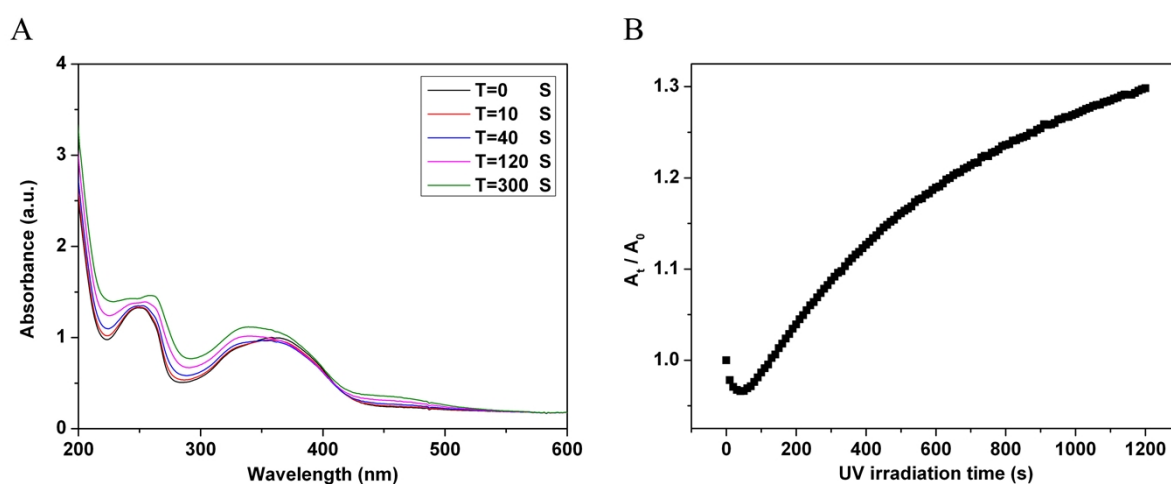

**Fig. S12** (A) The *trans-cis* photoisomerization kinetics of the annealed POCN film

under the irradiation with the UV light at 365 nm; (B) the relative absorbance ( $\lambda_{357}$ ) of the annealed POCN film in different time intervals when irradiated with the UV light at 365 nm.

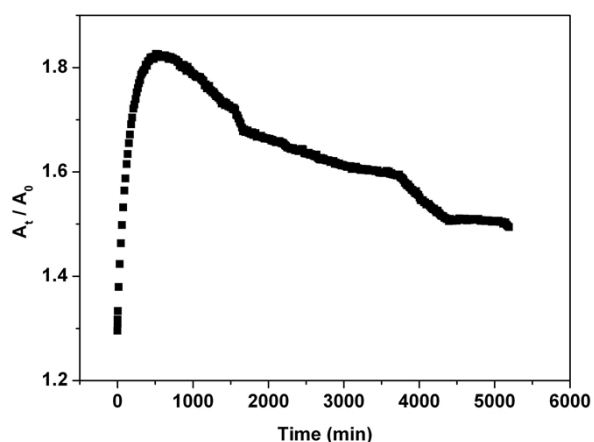

**Fig. S13** The relative absorbance ( $\lambda_{357}$ ) of the annealed POCN film in different time intervals in dark after irradiated by the UV light at 365 nm for 20 min.

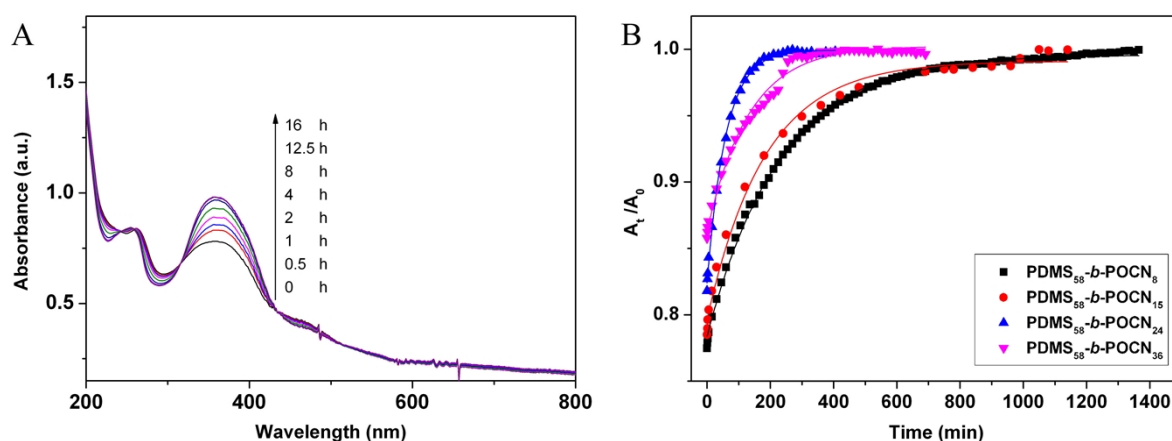

**Fig. S14** (A) The thermal *cis-trans* isomerization kinetics of the annealed film of PDMS-*b*-POCN<sub>15</sub> in dark at RT after irradiated with the UV light at 365 nm for 5 min; (B) the relative absorbance ( $\lambda_{357}$ ) of the annealed films of the diblock copolymers in different time intervals in dark at RT after irradiated with the UV light at 365 nm for 5 min.

**Table S1.** The parameters of photoisomerization of the polymers in solutions obtained from the curve-fitting by using equation  $A_t/A_0 = A + B \exp(-t/T)$

|                                                   | $R^2$ | $A$               | $B$               | $T$            |
|---------------------------------------------------|-------|-------------------|-------------------|----------------|
| POCN                                              | 0.992 | $0.140 \pm 0.023$ | $0.888 \pm 0.025$ | $43.7 \pm 3.7$ |
| PDMS <sub>58</sub> - <i>b</i> -POCN <sub>8</sub>  | 0.991 | $0.119 \pm 0.023$ | $0.913 \pm 0.026$ | $42.2 \pm 3.6$ |
| PDMS <sub>58</sub> - <i>b</i> -POCN <sub>15</sub> | 0.991 | $0.150 \pm 0.018$ | $0.850 \pm 0.024$ | $34.2 \pm 2.8$ |
| PDMS <sub>58</sub> - <i>b</i> -POCN <sub>24</sub> | 0.990 | $0.142 \pm 0.019$ | $0.867 \pm 0.026$ | $32.9 \pm 2.8$ |
| PDMS <sub>58</sub> - <i>b</i> -POCN <sub>36</sub> | 0.991 | $0.133 \pm 0.019$ | $0.897 \pm 0.026$ | $34.7 \pm 2.8$ |
